1 **Mutual predators: A descriptive cross-sectional study to identify prevalence and co-relation**  
2 **of Hepatitis C Virus and Human Immunodeficiency Virus type-1 coinfection**

3 Prof. Dr. Fouzia Ashraf\*<sup>1</sup>, Dalaq Aiysha<sup>1</sup>, Muhammad Tajamal<sup>1</sup>, Shahzeb Javed<sup>2</sup>, Saamia  
4 Tahir<sup>3</sup>, Omar Ali<sup>3</sup>. Prof. Dr. Mahmood Shaukat<sup>1</sup>

5 <sup>1</sup> Allama Iqbal Medical College / Jinnah Hospital, Allama Shabbir Ahmad Usmani Road, Lahore  
6 - 54550. Pakistan.

7 <sup>2</sup> King Edward Medical University and Mayo Hospital Road, Nelagumbad, Anarkali, Lahore  
8 54000, Pakistan.

9 <sup>3</sup> CMH Lahore Medical College & Institute of Dentistry, Abdur Rehman Road. Lahore, Cantt.,  
10 Lahore, Pakistan-54000

11 **Corresponding Author:** Prof. Dr. Fouzia Ashraf ([pcrjinnah@yahoo.com](mailto:pcrjinnah@yahoo.com))

12 **Keywords:** Human Immunodeficiency Virus, Hepatitis C Virus, Coinfection, correlation, Viral  
13 load.

14 **ABSTRACT**

15 **Background:** Coinfection, bacterial or viral origin, in HIV infected individuals' remains to be  
16 the only leading cause of deaths. This study was designed to analyze received plasma samples  
17 and plasma samples of referred patients for HIV testing to detect HIV and HCV mono and co-  
18 infection by real time PCR and finding co-relation of viral load of both viruses. Highlight and  
19 magnify the hidden coinfection, prior to seroconversion, of HIV type-1 and Hepatitis C Virus in  
20 received samples.

21 **Methods:** Analyses were based on randomly selected 78 patients' stored plasmas. Plasma  
22 samples were tested for both, HIV-type 1 and HCV viral RNA by real time PCR. Statistical  
23 formulas were used to identify men and the inter quartile range of patients age. The data were  
24 analyzed by IBM SPSS Statistics 21 (SPSS Inc., Chicago, IL). Study variables include gender,  
25 age and viral loads of HIV type-1 and HCV. Pearson correlation was used to evaluate any  
26 correlation in study variables.

27 **Result:** Prevalence of HCV was 10.3%, HIV-type 1 was 19.2% and their co-infection was 37.2  
28 percent. Thirty three percent individuals had no infection of both viruses. Gender based  
29 distribution showed that 74.4% (58/78) sample population was male. The mono-infection and  
30 co-infection was higher in males (39.7%) and highest viral load too. There was a positive  
31 correlation (CI= 95%) between the two variables; HIV and HCV viral loads, as  $r = 0.736$ ,  $n=29$ ,  
32  $p= 0.001$ .

33 **Conclusion:** Prevalence of HIV type-1 and HCV mono-infection and co-infection was higher  
34 among males as compared to females. Increased viral load was also evident among male co-  
35 infected individuals. This study proved the emergence of HCV coinfection in HIV infected  
36 individuals, and a need for on time diagnosis and treatment.

## 37 **Introduction**

38 Target cells of both viruses-Human Immunodeficiency Virus and Hepatitis C Virus-are different,  
39 but in co-infection their outcomes are deleterious due to increased disease progression in  
40 combined proliferation (Kim & Chung, 2009). Common mode of HIV and HCV transmission is  
41 by direct contact with body fluids of an infected person (Polsky, Kim & Chung, 2000–2001).  
42 Globally, prevalence of viral hepatitis among HIV infected people is seven million worldwide  
43 (Soriano et al., 2010). The prevalence rate of co-infection varies considerably between and  
44 within countries, depending on rate of risk factors in the population. Viral hepatitis is an  
45 emerging non-AIDS related, cause of morbidity and mortality among HIV patients (Bica et al.,  
46 2001).

47 In HCV mono-infection about fifteen to forty five percent patients with acute viral infection clear  
48 the virus, while twenty to fifty percent develop persistent viremia (Thomas & Seeff, 2005). The  
49 persistence of HIV and HCV is attributed to high rates of replication, its  $\sim 10^{12}$  and  $\sim 10^9$   
50 virion/day for HCV and HIV, respectively (Kim & Chung, 2009). Transmission of  
51 communicable disease has been an influential element in acquiring infection and disease  
52 progression. The highest rate of HIV type-1 and HCV co-infection has been reported to be 90  
53 percent among in-vitro drug users (Sherman et al., 2002). Hemophiliacs are the second dominant  
54 group of co-infection, who received contaminated blood or its products (Yee et al., 2000). The  
55 reported prevalence of HIV and HCV among blood donors of Pakistan is was, 3.78 and 0.06  
56 percent respectively (Sultan, Mehmood & Mahmood, 2007; Waheed et al., 2009; Waheed et al.,  
57 2010) Co-transmission of HIV and HCV can occur through percutaneous route among injection  
58 drug users, but they were usually infected first with HCV (Di Martino et al., 2001).

59 Hepatitis C Virus and HIV type-1 both belongs to two different families of viruses. This  
60 particular association has a major effect on their life cycle. HCV replicates through RNA-  
61 dependent RNA polymerase, (Bartenschlager, Lohmann & Lohmann, 2000) while HIV type-1  
62 first integrates its genetic material in host DNA through the viral reverse transcriptase enzyme  
63 and then replicates (Zheng, Lovsin & Peterlin, 2005). There is a direct relation to inoculum size  
64 and acquiring HCV infection, after transmission through blood transfusion or by contaminated  
65 needles, viremia occurs within days or it takes six to eight weeks, respectively (Maheshwari, Ray  
66 & Thuluvath, 2008). In America, a large cross-sectional analysis (n=1687) of two HIV trials,  
67 reported that 75% subjects had HCV RNA level above 800,000 IU/ml (Thomas & Seeff, 2005).

## 68 **Materials and Methods**

### 69 *Sample sources and preparation*

70 A cross-sectional study was conducted during the months of May, June and July 2014, among  
71 referred patients to Jinnah Hospital Lahore (JHL). JHL is the second largest teaching hospital,  
72 which provides health care facilities to the inhabitants of Lahore and adjacent areas. A random  
73 blood samples were collected from patients along with their age and gender. Laboratory testing  
74 was performed in molecular diagnostic lab, specialized for PCR testing of infectious diseases.  
75 Plasma from each sample was separated by centrifugation and stored at -20<sup>0</sup>C until analyzed.

### 76 *Nucleic acid extraction and amplification*

77 Viral RNA was extracted from 200µl of plasma using QIAamp VIRAL RNA mini-kit from  
78 Qiagen (CAT. No. 52904) from Germany. The PCR quantification of samples was carried out by  
79 Artus RT-PCR kit for HIV and HCV by Qiagen, for all randomly selected samples, regardless of

80 their serological result. Standard procedures, as proposed by Kwok and Higushi [1989], were  
81 followed to avoid contamination.

### 82 ***Study design and statistical analysis***

83 All study subjects were distributed in three groups, according to their age as, minors (< 18  
84 years), adult (>18 and < 50 years) and old (>50 years). They were also distributed according to  
85 gender; in three groups as follows: male, female and transgender. The mean age and inter  
86 quartile range were also calculated by statistical formulas. All data were analyzed by IBM SPSS  
87 Statistics 21 (SPSS Inc., Chicago, IL). Study variables include gender, age and viral loads of  
88 HIV type-1 and HCV.

### 89 **Results and Discussion**

90 The overall prevalence of co-infection, HIV and HCV mono-infection among walk-in patients of  
91 Jinnah Hospital, was 29 (37.2%), 15 (19.2%) and 8 (10.3%) respectively. Among 78 total  
92 participants, 26 (33.3 %) had no infection of HIV and HCV. Of the study population (n=78),  
93 25.6% (20/78); 74.4% (58/78) were female and males respectively. The mean age of the sample  
94 population, irrespective of gender, was 30 years with an inter-quartile range of 24 to 40. The  
95 youngest positive co-infected person was male of seven years and the oldest one male of 59  
96 years.

97 As shown in table 1 and figure 2; among 57 male participants, 23 (39.7%) had HIV and HCV co-  
98 infection, 13 (22.4%) carried the HIV mono - infection, 5 (8.6%) carried the HCV mono -  
99 infection and rest 17 (29.3%) had no infection of both viruses. Among twenty female, the  
100 distribution of HIV or HCV mono-infection and co-infection of both (HIV and HCV) was 2  
101 (10%), 3 (15%) and 6 (30%), respectively. Nine females, representing 45% of the female

102 population (n=20), had no infection of both HIV and HCV. There was a positive correlation  
 103 between the two variables; HIV and HCV viral loads, as  $r = 0.736$ ,  $n=29$ ,  $p= 0.001$ . Figure 1  
 104 shows the prevalence of HIV and HCV co-infection, HIV type 1 and HCV mono-infection in the  
 105 study population, while table 2 shows the number of cases of HIV and HCV co-infection, mono-  
 106 infection and no infection of both viruses in different age groups.

107 **Table 1 Prevalence of HIV and HCV in different gender groups**

|                           | Male (n=57/78) |               | Female (n=20 / 78) |             | Trans-gender |            |
|---------------------------|----------------|---------------|--------------------|-------------|--------------|------------|
| <b>Co-infection</b>       | 23             | 39.7 %        | 6                  | 30 %        | 0            | <b>0 %</b> |
| <b>HIV mono-infection</b> | 13             | 22.4 %        | 2                  | 10 %        | 0            | <b>0%</b>  |
| <b>HCV mono-infection</b> | 5              | 8.6 %         | 3                  | 15 %        | 0            | <b>0 %</b> |
| <b>No-infection</b>       | <b>17</b>      | <b>29.3 %</b> | <b>9</b>           | <b>45 %</b> | <b>0</b>     | <b>0%</b>  |

108

109 **Table 2 Prevalence of HIV and HCV in different age groups**

|                           | Minor ≤ 18 years |       | Adult >18 & < 50 years |        | Old ≥ 50 years |       |
|---------------------------|------------------|-------|------------------------|--------|----------------|-------|
| <b>Co-infection</b>       | 3                | 3.8%  | 25                     | 32.1 % | 1              | 1.3 % |
| <b>HIV mono-infection</b> | 0                | 0 %   | 11                     | 14.1 % | 3              | 3.8%  |
| <b>HCV mono-infection</b> | 0                | 0%    | 6                      | 7.7 %  | 2              | 2.6 % |
| <b>No-infection</b>       | 1                | 1.3 % | 23                     | 29.5 % | 3              | 3.8%  |

110

111 The results we present here show the prevalence of HIV type-1 and HCV co-infection among  
 112 walk-in patients of Lahore region. The analysis revealed increased prevalence of co-infection of  
 113 both persistent viruses. An estimated five to ten million people in the world are living with HIV  
 114 and HCV co-infection (Operskalski & Kovacs, 2011). The detection of HCV RNA, during initial

115 HCV infection, is possible after two to fourteen days of exposure (Hajarizadeh, Grebely J &  
116 Dore, 2013). The seroconversion of Hepatitis C Virus is delayed in HIV positive co-infected  
117 individuals, possibly due to the immunosuppression trade mark of HIV infection. Only three  
118 studies revealed zero to thirteen percent incidence of seronegative chronic Hepatitis C virus  
119 infection (Thio et al., 2000; Chamie et al., 2007; Thomson et al., 2009). Such silent and  
120 persistent infection not only alters the course of HIV disease progression, but also results an  
121 ineffective treatment and its outcomes (Antonucci et al., 2005; Hua et al., 2013). Therefore, on  
122 time and accurate diagnosis is vital for survival.

123 This study established the presence of HIV and HCV co-infection among general, random  
124 infected population of Punjab. Among the HIV positive individuals (n=43) of our study, 67.5 %  
125 were co-infected with Hepatitis C Virus. The highest (90%) reported HIV and HCV co-infection  
126 was among jail inmates of Sindh, Pakistan (Safdar, Mehmood & Abbas, 2009); followed by  
127 73.74% in Lahore inmates (Nafees et al., 2011). The highest prevalence of co-infection; 32.1 %  
128 has been seen among the adult population of our study. The prevalence of HCV co-infection was  
129 less in our study as compared to the reported prevalence; 53.54% of Nafees et al., (2011).

130 In the sample population, no significant statistical relation was found between age and gender  
131 groups with an incidence of mono or co-infections. However, in our study, the male population  
132 (74%) as compared to the female population (26%) had a higher prevalence of HIV and HCV  
133 mono/co-infections. Our study has a higher percentage of male population as compared to other  
134 recently reported study (Khan, Ali & Awan, 2013), but less as compared to the study of jail  
135 inmates in Lahore (Nafees et al., 2011). Three minor individuals in our study; aged 7, 15 and 17  
136 years, had co-infection of HIV and HCV; among them one was female of 15 years. A prevalence  
137 of coinfection in minor population (3.8 %) was observed in our data which was not reported

138 before in any other studies (Nafees et al., 2011; Khan, Ali & Awan, 2013). The mean age of our  
139 study group was 30 years old. This mean age was equal to the sample population of previous  
140 reported study (Samo et al., 2013) but, more as compared to other reported studies from this  
141 region irrespective of their risk population and gender (Nafees et al., 2011; Khan, Ali & Awan,  
142 2013).

143 This study was aimed to see any kind of correlation between viral load of HIV type-1 and HCV  
144 co-infected individuals. Pearson's correlation model showed evidence of significant ( $P < 0.001$ )  
145 supporting results of our hypothesis (CI=95%). Positive and less than one value of  $r$  ( $r = 0.736$ ),  
146 indicated strong relationship between viral load and correlation in pathogenesis of HIV type-1  
147 and HCV. This correlation indicated that increase in HIV type-1 viral load associated with an  
148 increase in HCV viral load. Many other studies have shown similar results of correlation  
149 between HIV type-1 viral load and HCV viral load (Sherman et al., 1993; Mazza et al., 1994;  
150 Eyster et al., 1994; Cribier et al., 1995; Thomas et al., 1996; Cribier et al., 1997; Beld et al.,  
151 1998). Immediate prevention and surveillance measures are needed to control the spread of  
152 mono-transmission as well as co-transmission of HIV type-1 and HCV infections.

### 153 **Conclusions**

154 The prevalence rate of coinfection of HIV type-1 and Hepatitis C virus is much higher in our  
155 study conducted in a metropolitan city, Lahore, Pakistan. Co-infection of Hepatitis C Virus is  
156 associated with increase viral replication helping in disease progression of both viruses, HIV  
157 type-1 and HCV, irrespective of gender and age. Health care professionals should include  
158 molecular diagnosis of HCV during a routine evaluation of HIV suspected and infected  
159 individuals.



160 **Acknowledgement:** This study was not possible without our sample sources and laboratory  
161 staff.

## 162 **References**

- 163 Antonucci G, Girardi E, Cozzi-Lepri A, Capobianchi MR, De Luca A, Puoti M, Petrelli E,  
164 Carnevale G, Rizzardini G, Grossi PA, Viganò P, Moioli MC, Carletti F, Solmone M,  
165 Ippolito G, Monforte AD. 2005. Role of hepatitis C virus (HCV) viremia and HCV  
166 genotype in the immune recovery from highly active antiretroviral therapy in a cohort of  
167 antiretroviral-naïve HIV-infected individuals. *Clinical Infectious Diseases*, 40:e101-e109.
- 168 Bartenschlager R, Lohmann V; Lohmann. 2000. Replication of hepatitis C virus. *Journal of*  
169 *General Virology*, 81: 1631–48.
- 170 Beld M, Penning M, Lukashov V, McMorrow M, Roos M, Pakker N, and Goudsmit J. 1998.  
171 Evidence that both HIV and HIV-induced immunodeficiency enhance HCV replication  
172 among HCV seroconverters. *Virology* 244:504-12.
- 173 Bica I, McGovern B, Dhar R, Stone D, McGowan K, Scheib R, Snyderman DR. 2001. Increasing  
174 mortality due to end-stage liver disease in patients with human immunodeficiency virus  
175 infection. *Clinical Infectious Disease*, 32:492– 497.
- 176 Chamie G, Bonacini M, Bangsberg DR, Stapleton JT, Hall C, Overton ET, Scherzer R, Tien PC.  
177 2007. Factors associated with seronegative chronic hepatitis C virus infection in HIV  
178 infection. *Clinical Infectious Disease*, 44: 577-583.
- 179 Cribier B, Rey D, Schmitt C, Lang JM, Kirn A, Stoll-Keller F. 1995. High Hepatitis C viremia  
180 and impaired antibody response in patients coinfecting by HIV. *Acquired Immuno*  
181 *Deficiency Syndrome*, 9:1131-6.
- 182 Cribier B, Schmitt C, Rey D, Uhl G, Lang JM, Vetter D, and Stoll-Keller F. 1997. HIV increased  
183 hepatitis C viremia irrespective of the hepatitis C virus genotype. *Research in Virology*,  
184 148:267-71.
- 185 Di Martino V, Rufat P, Boyer N, Renard P, Degos F, Martinot-Peignoux M, Matheron S, Le  
186 Moing V, Vachon F, Degott C, Valla D, Marcellin P. 2001. The influence of human  
187 immunodeficiency virus coinfection on chronic hepatitis C in injection drug users: a  
188 long-term retrospective cohort study. *Journal of Hepatology*, 34:1193–1199.
- 189 Eyster ME, Fried MW, Di Bisceglie AM, and Goedert JJ. 1994. Increased Hepatitis C virus RNA  
190 levels in hemophiliacs: relationship of human immunodeficiency virus infection and liver  
191 disease. *Blood*, 84:1020-3.
- 192 Hajarizadeh B, Grebely J, Dore GJ. 2013. Epidemiology and natural history of HCV infection.  
193 *Nature Reviews in Gastroenterology and Hepatology*, 10: 553-562.
- 194 Hua L, Andersen JW, Daar ES, Glesby MJ, Hollabaugh K, Tierney C. 2013. Hepatitis C  
195 virus/HIV coinfection and responses to initial antiretroviral treatment. *Acquired Immuno*  
196 *Deficiency Syndrome*, 27: 2725-2734.
- 197 Khan Y, Ali S, Awan MB. 2013. Frequency of newly diagnosed hepatitis b and c viruses in  
198 patients with human immunodeficiency virus and their common leading factors. *Khyber*  
199 *Journal of Medical Sciences*, Vol. 6, No. 2

- 200 Kim AY and Chung RT. 2009. Coinfection With HIV-1 and HCV—A One-Two Punch.  
201 *Gastroenterology*, 137(3): 795–814.
- 202 Kwok SA & Higuchi R. 1989. Avoiding false positives with PCR. *Nature*, 339, 237-238.
- 203 Maheshwari A, Ray S, Thuluvath PJ. 2008. Acute hepatitis C. *Lancet*, 372:321–332.
- 204 Mazza C, Ravaggi A, Pouti M, Albertini, A and Cariani, E. 1994. Increased HCV titer and  
205 absence of selection of E2-hypervariable region (HVRI) in HCV/HIV coinfection.  
206 *Journal of Hepatology*, 21:S34.
- 207 Nafees M, Qasim A, Jafferri G, Anwar MS, Muazzam M. 2011. HIV Infection, HIV/HCV and  
208 HIV/HBV co-infections among Jail Inmates of Lahore. *Pakistan Journal of Medical  
209 Sciences*, 27(4):837-841.
- 210 Operskalski EA, Kovacs A. 2011. HIV/HCV co-infection: pathogenesis, clinical complications,  
211 treatment, and new therapeutic technologies. *Current HIV/AIDS Reports*, 8: 12-22.
- 212 Polsky B, Kim AY, Chung RT. 2000–2001. Human immunodeficiency virus and hepatitis B and  
213 C coinfection: pathogenic interactions, natural history and therapy. *AIDS Clinical  
214 Reviews*, 263–306.
- 215 Safdar S, Mehmood A, Abbas SA. 2009. Prevalence of HIV/AIDS among jail inmates in Sindh.  
216 *Journal of Pakistan Medical Association*, 59(2):111-112.
- 217 Samo RN, Altaf A, Agha A, Pasha O, Rozi S, Memon A, Azam S, Blevins M, Vermund SH.,  
218 Shah SA. 2013. High HIV Incidence among Persons Who Inject Drugs in Pakistan:  
219 Greater Risk with Needle Sharing and Injecting Frequently among the Homeless. *Plos  
220 ONE*, 8(12): e81715.
- 221 Sherman K, Rouster S, Chung R, Rajicic N. 2002. Hepatitis C virus prevalence among patients  
222 infected with human immunodeficiency virus: a cross-sectional analysis of the US adult  
223 AIDS clinical trials groups. *Clinical Infectious Disease*, 34:831–837.
- 224 Sherman KE, O'Brien J, Guteierrez AG, Harrison S, Urdea M, Neuwald P, and Wilber J. 1993.  
225 Quantitative evaluation of hepatitis C virus RNA in patients with concurrent human  
226 immunodeficiency virus infection. *Journal of Clinical Microbiology*, 31:2679-82.
- 227 Soriano V, Vispo E, Labarga P, Medrano J, Barreiro P. 2010. Viral hepatitis and HIV co-  
228 infection. *Antiviral Research Journal*, 85:303–15.
- 229 Sultan F, Mehmood T, Mahmood MT. 2007. Infectious pathogens in volunteer and replacement  
230 blood donors in Pakistan: a ten-year experience. *International Journal of Infectious  
231 Diseases*, 11: 407-412.
- 232 Thio CL, Nolt KR, Astemborski J, Vlahov D, Nelson KE, Thomas DL. 2000. Screening for  
233 hepatitis C virus in human immunodeficiency virus-infected individuals. *Journal of  
234 Clinical Microbiology*, 38: 575-577.
- 235 Thomas DL and Seeff LB. 2005. Natural history of hepatitis C. *Clinics in Liver Disease*,  
236 9(3):383–98.
- 237 Thomas DL, Shih JW, Alter HJ, Vlahov D, Cohn S, Hoover DR, Cheung L, Nelson KE. 1996.  
238 Effect of human immunodeficiency virus on hepatitis C virus infection among injecting  
239 drug users. *Journal of Infectious Diseases*, 174:690-5.
- 240 Thomson EC, Nastouli E, Main J, Karayiannis P, Eliahoo J, Muir D, McClure MO. 2009.  
241 Delayed anti-HCV antibody response in HIV-positive men acutely infected with HCV.  
242 *AIDS*, 23: 89-93.
- 243 Waheed Y, Rahat TB, Safi SZ, Qadri I. 2010. Epidemiological patterns and risk factors  
244 associated with hepatitis B virus in Pakistani population. *Asian Biomedicine*, 4: 547-554.

- 245 Waheed Y, Shafi T, Safi SZ, Qadri I. 2009. Hepatitis C virus in Pakistan: a systematic review of  
246 prevalence, genotypes and risk factors. *World Journal of Gastroenterology*, 15:5647-  
247 5653.
- 248 Yee T, Griffioen A, Sabin C, Dusheiko G, Lee C. 2000. The natural history of HCV in a cohort  
249 of hemophiliac patients infected between 1961 and 1985. *Gut*, 47:5–851.
- 250 Zheng YH, Lovsin N, Peterlin BM. 2005. Newly identified host factors modulate HIV  
251 replication. *Immunology Letters*, 97 (2): 225–34.

252  
253 Figure 1: Prevalence of HIV and HCV mono or co-infection in sample population (n=78)

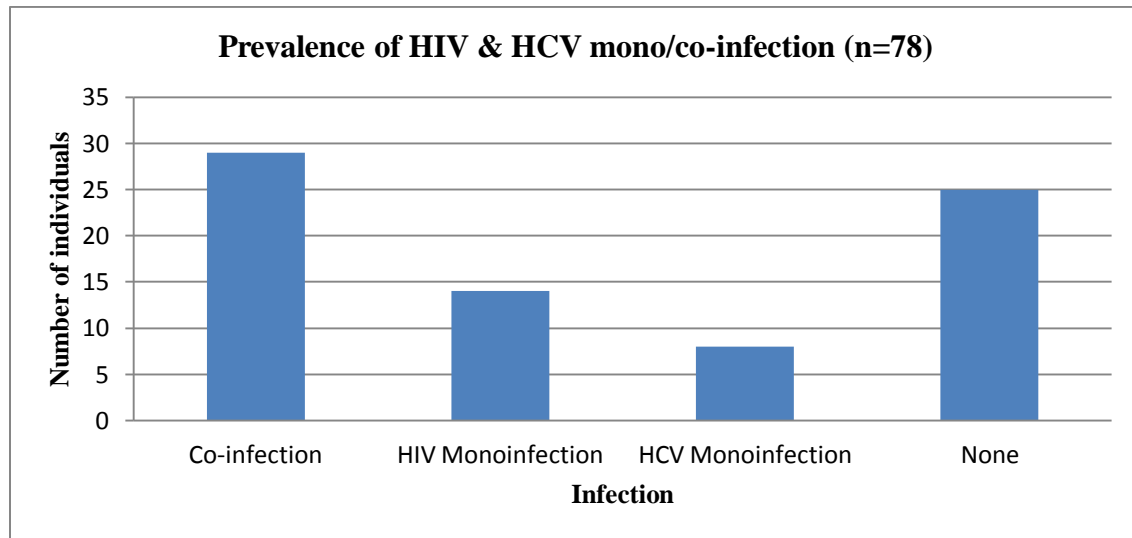

254

255

256 Figure 2: Prevalence of HIV and HCV mono or co-infection in different gender groups

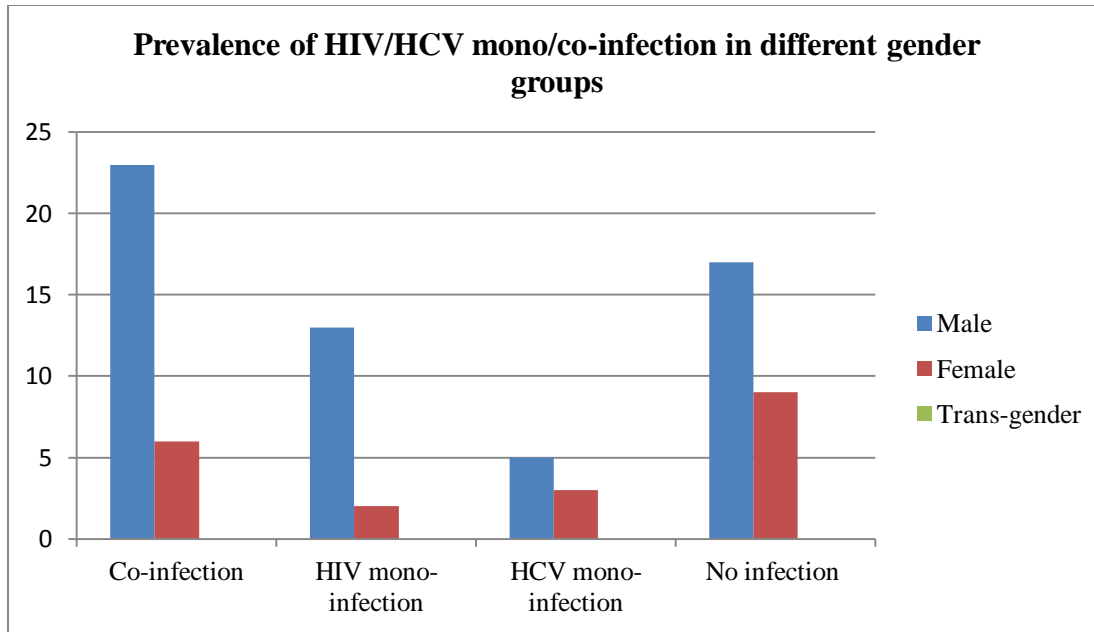

257

258 Figure 3: Prevalence of HIV and HCV in different age groups (n=78)

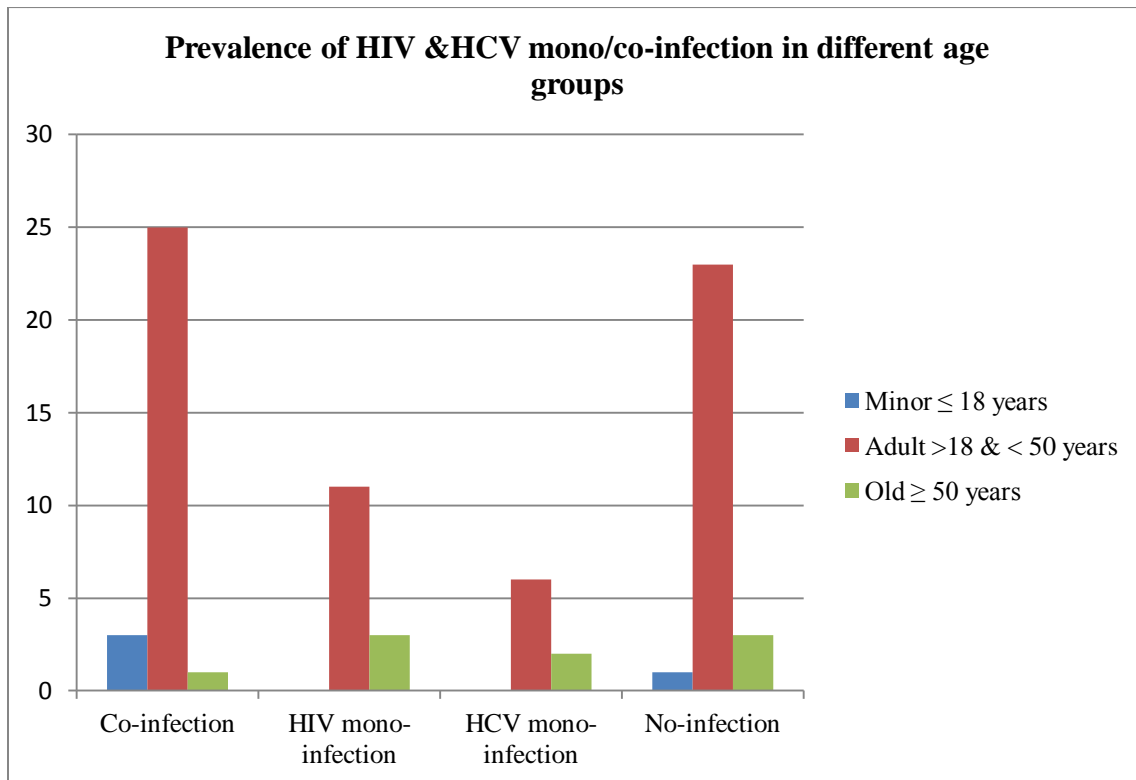

259
